1 **Development of a Rapid Point-Of-Care Test that Measures Neutralizing Antibodies to**  
2 **SARS-CoV-2**

3 Douglas F. Lake<sup>1\*#</sup>, Alexa J. Roeder<sup>1\*</sup>, Erin Kaleta<sup>2</sup>, Paniz Jasbi<sup>3</sup>, Sivakumar Periasamy<sup>4,5</sup>  
4 Natalia Kuzmina<sup>4,5</sup> Alexander Bukreyev<sup>4,5,6</sup>, Thomas Grys<sup>2</sup>, Liang Wu<sup>7</sup>, John R Mills<sup>7</sup>, Kathrine  
5 McAulay<sup>2</sup>, Maria Gonzalez-Moa<sup>8</sup>, Alim Seit-Nebi<sup>8</sup>, and Sergei Svarovsky<sup>8</sup>

6  
7 Affiliations:

- 8 1. School of Life Sciences, Arizona State University, Tempe AZ, USA
- 9 2. Mayo Clinic Arizona, Department of Laboratory Medicine and Pathology, Scottsdale, AZ,  
10 USA
- 11 3. College of Health Solutions, Arizona State University, Phoenix AZ, USA
- 12 4. Department of Pathology, University of Texas Medical Branch at Galveston, Galveston,  
13 TX USA
- 14 5. Galveston National Laboratory, University of Texas Medical Branch at Galveston,  
15 Galveston, TX USA
- 16 6. Department of Microbiology and Immunology University of Texas Medical Branch at  
17 Galveston, Galveston, TX USA
- 18 7. Mayo Clinic Rochester, Department of Laboratory Medicine and Pathology, Rochester,  
19 MN USA
- 20 8. Axim Biotechnologies Inc, San Diego, CA USA

21 \*Co-first authors

22  
23 Running Head: Rapid Neutralization Test for COVID-19

24 #Address correspondence to Douglas F. Lake, [douglas.lake@asu.edu](mailto:douglas.lake@asu.edu)

25  
26 Douglas F Lake and Alexa J Roeder contributed equally to this work. Author order was  
27 determined on the basis of seniority

28  
29  
30

31

32 **Abstract:**

33 As increasing numbers of people recover from and are vaccinated against COVID-19, tests are  
34 needed to measure levels of protective, neutralizing antibodies longitudinally to help determine  
35 duration of immunity. We developed a lateral flow assay (LFA) that measures levels of  
36 neutralizing antibodies in plasma, serum or whole blood. The LFA is based on the principle that  
37 neutralizing antibodies inhibit binding of the spike protein receptor-binding domain (RBD) to  
38 angiotensin-converting enzyme 2 (ACE2). The LFA compares favorably with authentic SARS-  
39 CoV-2 and pseudotype neutralization assays with an accuracy of 98%. Sera obtained from  
40 patients with seasonal coronaviruses did not prevent RBD from binding to ACE2. To  
41 demonstrate the usefulness of the LFA for measuring antibodies in convalescent plasma used  
42 for therapy, we measured conversion of non-immune plasma into strongly neutralizing plasma.  
43 This is the first report of a neutralizing antibody test that is rapid, highly portable and relatively  
44 inexpensive that might be useful in assessing COVID-19 vaccine-induced immunity.

45

46

47 **Introduction**

48 The pandemic virus, Severe Acute Respiratory Syndrome Coronavirus-2 (SARS-CoV-2)  
49 continues to be transmitted by person to person spread from its origin in Wuhan, China in  
50 December 2019(1–3) . Vaccine trials are ongoing, and preliminary results from at least 2  
51 vaccines show that the vaccines elicit protective immunity, but durability of vaccine responses is  
52 not known(4).

53

54

55

56

57

Molecular tests such as PCR detect SARS-CoV-2 nucleic acid in nasopharyngeal secretions and saliva and are diagnostic of infection(5). These molecular tests can determine the rate of infection and potential re-infection. When negative they indicate that patients have cleared the virus. In response to infection, all immunocompetent hosts generate antibodies against the virus. Patients may have a positive serologic test result as well as a PCR-positive

58 test result if they are early in convalescence(6). For SARS-CoV-2, antibodies to spike protein  
59 do not always predict recovery from COVID-19(7).

60 Although immunocompetent individuals infected with SARS-CoV-2 generate antibodies  
61 against the virus, it is essential to know which individuals generate high levels of neutralizing  
62 antibodies (NAbs) so that they can resume normal activities without fear of being re-infected  
63 and spreading the virus to others(8–10). The goal of COVID-19 vaccines is to induce NAbs and  
64 T cell responses that prevent infection/re-infection. Additionally, development of NAbs indicates  
65 which individuals might be optimal donors for convalescent plasma protocols. Although NAbs  
66 are important for elimination of the virus and protection from subsequent infection, it has been  
67 reported by several groups that up to one-third of convalescent plasma samples from individuals  
68 who have recovered from COVID-19 do not neutralize SARS-CoV-2 or spike pseudotype virus  
69 infection(11–13).

70 Viral neutralization assays measure levels of antibodies that block infection of host cells.  
71 Two main types of viral neutralization assays are utilized for SARS-CoV-2. Authentic  
72 microneutralization assays measure reduction of viral plaques or infectious foci in  
73 microneutralization assays in susceptible host cells using SARS-CoV-2 under BSL3 conditions.  
74 These assays are slow, laborious, require highly trained personnel and require a BSL3 facility.  
75 Pseudotype virus neutralization assays have been developed in which SARS-CoV-2 spike  
76 protein is expressed in a virus such as vesicular stomatitis virus or lentivirus(14, 15). These  
77 assays are faster and less dangerous than authentic microneutralization assays, but still require  
78 BSL2 conditions and 24-48 hours for results. Another challenge is that both authentic and  
79 pseudovirus virus neutralization assays depend on host cells for infection which adds variability  
80 to the assay.

81 It is known that SARS-CoV-2 uses receptor binding domain (RBD) on spike protein to  
82 bind angiotensin converting enzyme 2 (ACE2) on host cells; this appears to be the principal

83 neutralizing domain of SARS-CoV-2(16, 17). Using this knowledge, we developed a lateral flow  
84 assay (LFA) that measures levels of (neutralizing) antibodies which block RBD from binding to  
85 ACE2. Other groups have developed RBD-ACE2-based competition ELISAs(18)-(19) but none  
86 have developed a rapid, highly portable semi-quantitative point-of-care (POC) test.

87

## 88 **Methods**

### 89 *Human Subjects and Samples*

90 Peripheral blood, serum and plasma were collected for this study under an Arizona State  
91 University institutional review board (IRB) approved protocol #0601000548 and Mayo Clinic IRB  
92 protocol #20-004544. Plasma was obtained by ficoll gradient separation of peripheral blood and  
93 serum was obtained by centrifugation 30 minutes after drawing blood. Plasma and serum  
94 samples obtained from excess clinical samples at Mayo Clinic were pre-existing, de-identified  
95 and leftover from normal workflow. COVID-19 samples ranged from 3 to 84 days post PCR  
96 positive result. Residual clinical samples were stored at 2-8°C for up to 7 days, and frozen at  
97 -80°C thereafter.

98 Serum samples from patients with non-COVID-19 respiratory illnesses were also tested.  
99 These specimens were collected from patients from 2/14/17 – 4/6/20 and were tested by the  
100 FilmArray Respiratory Panel 2 (RP2) (Biofire Diagnostics, Salt Lake City, UT) respiratory virus  
101 panel as part of routine clinical workflow. Specimens were stored at -80°C until analysis.

102

### 103 *Pseudotype Virus Neutralization Assays*

104 Titers were obtained from 60 COVID-19 patient sera using a vesicular stomatitis virus (VSV)  
105 spike protein pseudotype assay as previously reported with modifications (14). Patient sera had  
106 been stored at -80°C prior to testing. Briefly, SARS-CoV-2 pseudotypes were created by  
107 replacing VSV G glycoprotein with SARS-CoV-2 spike protein resulting in a pseudotyped virus  
108 with the C-terminal 19 amino acids removed from spike. The pseudotyped virus is called VSV-

109 SARS-CoV-2-S-Δ19CT and was produced by BHK-21 cells. It induces syncytium formation  
110 when incubated with vero cells. Two different Vero cells encoding split product luciferase  
111 (DSP1 and DSP2) were cultured at a 1:1 ratio as a monolayer. Virus-induced fusion leads  
112 to luciferase complementation and in the presence of luciferase substrate  
113 EnduRen™ (Promega, Madison, WI) generates luminescence. The higher luminescence, the  
114 more infection events by the virus. A human monoclonal antibody (Regeneron, Tarrytown,  
115 NY) targeting the SARS-CoV-2 spike protein was diluted to set a cut-off at 50% neutralizing  
116 activity and utilized as a single point calibrator. Patient sera with serial dilutions (1:80-  
117 1:2560) and the calibrator were pre-incubated with virus for 30 minutes (neutralization) prior to  
118 addition to DSP1 and DSP2 Vero cells. The virus-cell mixture was incubated at 37°C in a 5%  
119 CO<sub>2</sub> incubator for a total of 24 hours before luminescence reading; the substrate  
120 EnduRen™ was added at 18 hours of incubation. The raw luminescence signal of each sera  
121 dilution was compared against the raw luminescence signal of the calibrator. The  
122 last consecutive dilution with luminescence signal below the calibrator was considered the end-  
123 point titer. Samples were tested in duplicate. The same serum samples, 68 coded sera (10  
124 serum samples at titers of 1:80, 1:160, 1:320, 1:640, 1:1280, 1:2560 and 8 serum samples from  
125 individuals never infected with COVID-19) were frozen at -20°C and shipped by Dr. Mills from  
126 Mayo Clinic Rochester to Mayo Clinic Arizona and the Lake Lab for LFA testing.

127

#### 128 *Authentic SARS-CoV-2 Microneutralization Assay*

129 The authentic microneutralizing assay was performed using a recombinant SARS-CoV-2 that  
130 expresses mNeonGreen (SARS-CoV-2ng) during replication in permissive cells, as previously  
131 described (20). Inhibitory concentrations for which 50% of virus is neutralized by serum  
132 antibodies (IC<sub>50</sub> values) were obtained on a unique set of 38 COVID-19 sera. Sixty µl aliquots of  
133 SARS-CoV-2ng were pre-incubated for 1 h in 5% CO<sub>2</sub> at 37°C with 60µl serial 2-fold serum

134 dilutions in cell culture media, and 100µl were inoculated into Vero-E6 monolayers in black  
135 polystyrene 96-well plates with clear bottoms (Corning, Tewksbury, MA ). Each serum was  
136 tested in duplicates. The final amount of the virus was 200 PFU/well, and the starting serum  
137 dilution was 1:20 and the end dilution was 1280 unless an IC<sub>50</sub> was not reached in which case  
138 serum was diluted to 1:10240. Cells were maintained in Minimal Essential Medium  
139 (ThermoFisher Scientific, Waltham, MA) supplemented by 2% FBS (HyClone, Logan, UT) and  
140 0.1% gentamycin in 5% CO<sub>2</sub> at 37°C. After 2 days of incubation, fluorescence intensity of  
141 infected cells was measured at a 488 nm wavelength using a Synergy 2 Cell Imaging Reader  
142 (Biotek, Winooski, VT). The signal readout was normalized to virus control aliquots with no  
143 serum added and was presented as the percentage of neutralization. IC<sub>50</sub> was calculated with  
144 GraphPadPrism 6.0 software. Work with infectious SARS-CoV-2ng was performed in a BSL-3  
145 biocontainment laboratory of the University of Texas Medical Branch, Galveston, Tx, Galveston  
146 National Laboratory.

147

#### 148 *Serologic Antibody Assay*

149 The Ortho Vitros Anti-SARS-CoV-2 IgG test was performed on the Ortho Clinical  
150 Diagnostics Vitros 3600 Immunodiagnosics System (Ortho, Raritan, NJ) following  
151 manufacturer's instructions at the Mayo Clinic. This assay is approved for use in clinical testing  
152 under FDA Emergency Use Authorization to qualitatively detect antibody to the S1 subunit of  
153 SARS-CoV-2 spike protein. Results are reported as reactive (S/CO ≥ 1.0) or Nonreactive (S/CO  
154 <1.0). Quantitative results are not reported for clinical workflows but are measured and recorded  
155 in this assay. Specimens were tested within 7 days of collection and were stored at 2-8°C per  
156 manufacturer's instructions. This assay was performed after the VSV assay was performed on  
157 the set of 60 serum samples, then the samples were frozen at -80°C before running them on the  
158 LFA. A separate set of 38 samples was run concurrently in the SARS-CoV-2 authentic  
159 microneutralizing antibody assay, the LFA, and the Ortho Vitros Anti-SARS-CoV-2 IgG assay.

160 *Lateral Flow Neutralizing Antibody Assay*

161           The Lateral Flow Neutralizing Antibody assay was developed to detect antibodies that  
162 compete with ACE2 for binding to RBD. The LFA cassette contains a test strip composed of a  
163 sample pad and blood filter, conjugate pad, nitrocellulose membrane striped with test and  
164 control lines, and an absorbent pad to wick excess moisture (Axim Biotechnologies Inc, San  
165 Diego, CA). The blood filter allows serum to pass through but prevents red blood cells and  
166 leukocytes from interfering with the assay. Test strips are secured in a cassette that contains a  
167 single sample port (Empowered Diagnostics, Pompano Beach, FL). For procedural control  
168 purposes, the LFA also contains a control mouse antibody conjugated to red gold nanospheres  
169 and corresponding anti-mouse control line.

170           LFAs were performed at ambient temperature and humidity on a dry, flat surface and left  
171 to run undisturbed for 10 minutes prior to reading results. First, 10 $\mu$ l of plasma, serum or whole  
172 blood were transferred to the cassette sample port and immediately followed by two drops  
173 (~50 $\mu$ l) of chase buffer. After 10 minutes, each test was placed in an iDetekt RDS-2500 LFA  
174 reader (Austin, TX) and the densities of both test and control lines were recorded electronically.  
175 This assay was performed on the VSV subset (n = 60) as well as the authentic SARS-CoV-2  
176 microneutralizing antibody assay subset (n = 38).

177           Serum samples from COVID-19 patients as well as sera from patients with PCR-  
178 confirmed seasonal respiratory viruses including PCR-confirmed seasonal coronaviruses were  
179 tested in the LFA as controls. Twenty-seven sera from patients with seasonal respiratory  
180 viruses were tested in the LFA in a manner identical to COVID-19 sera.

181           The test leverages the interaction between RBD-conjugated green-gold nanoshells  
182 (Nanocomposix, San Diego, CA) that bind ACE2 at the test line when RBD-binding/neutralizing

183 antibodies (RBD-NAbs) are absent or low. As indicated by the competitive nature of this assay,  
184 test line density is inversely proportional to RBD-NAbs present within the sample. Thus, an  
185 absent or faint test line indicates high levels of RBD-NAbs, whereas a dark or strong test line  
186 suggests lack of RBD-NAbs within a given plasma sample (Figure 1A).

187 As a semi-quantitative test, the results of the LFA can be interpreted using a scorecard  
188 or a densitometer. Figure 1B demonstrates the scorecard. Red control line across from the “C”  
189 on the cassette is composed of a mouse monoclonal antibody coupled to red-gold beads  
190 binding to an anti-mouse IgG. A red line indicates that the test ran properly and the green test  
191 line across from the “T” can be used to semi-quantitatively measure the ability of plasma, serum  
192 or whole blood to block RBD on green-gold nanoshells from binding to ACE2.

193 To demonstrate the ability of the test to measure NAbs in whole blood, 10 $\mu$ g of a  
194 neutralizing monoclonal antibody (mAb) based on the sequence of B-38(20)(Axim  
195 Biotechnologies, Inc, San Diego, CA) was mixed with 10 $\mu$ l of normal donor whole blood  
196 collected in a heparinized blood collection tube. Two-fold dilutions were made in whole blood to  
197 a final concentration of 0.625 $\mu$ g/ml neutralizing mAb. Then, 10 $\mu$ l of each dilution were  
198 transferred to LFA cassettes, chased with 50 $\mu$ l running buffer, and read with an LFA reader after  
199 10 minutes.

200

#### 201 *Conversion of Non-immune Normal Human Plasma (NIHP) into Neutralizing Plasma*

202 To convert NIHP into strongly neutralizing plasma (SNP), plasma from a convalescent  
203 donor who demonstrated the ability to block RBD from binding to ACE2 (M21) was mixed with  
204 NIHP collected prior to December 2019. For example, for a 1% mixture, 1 $\mu$ l of SNP was mixed  
205 with 99 $\mu$ l NIHP; for a 5% mixture 5 $\mu$ l of SNP was admixed with 95 $\mu$ l NIHP, etc. We performed  
206 the test with 10 $\mu$ l of 1%, 5%, 10%, and 20% SNP admixed into NIHP.

207



## 208 *Data Analysis*

209 Pearson's correlation ( $r$ ) was conducted to assess the strength and significance of  
210 associations between the LFA, the Ortho Vitros Anti-SARS-CoV-2 IgG test, VSV titers and  $IC_{50}$   
211 values. Regression analysis using  $IC_{50}$  values was performed to evaluate consistency(18) while  
212 Bland-Altman plots were constructed to assess agreement and bias(21, 22). Correlation analysis  
213 was conducted using IBM SPSS (Armonk, NY). Regression analysis was performed using  
214 Microsoft Excel (Redmond, WA); Bland-Altman plots were visualized using IBM SPSS. For two-  
215 group analysis,  $IC_{50}$  values corresponding to  $>240$  were categorized as titer of  $\geq 1:320$   
216 (neutralizing), whereas  $IC_{50}$  values  $\leq 240$  were categorized as  $\leq 1:160$  (non-neutralizing). Receiver  
217 operating characteristic (ROC) analysis was performed to assess classification accuracy,  
218 sensitivity, and specificity of the LFA and Ortho Vitros Anti-SARS-CoV-2 IgG test methods in  
219 assessing neutralizing capacity; optimal cutoffs for each method were established to maximize  
220 area under curve (AUC)(23, 24). ROC analysis was conducted using R language in the RStudio  
221 environment (version 3.6.2; RStudio PBC, Boston, MA). All analyses were conducted using raw  
222 values; data were not normalized, transformed, or scaled.

223

## 224 **Results**

225 The lateral flow assay reported here is a rapid 10-minute POC test. As shown in the  
226 schematic in **Figure 1A**, this test utilizes serum, plasma or whole blood to semi-quantitatively  
227 measure levels of NABs. An example of strong, moderate and non-neutralizing sera is shown in  
228 **Figure 1B**. As diagrammed in **Figure 1A**, levels of NABs in serum or plasma are reflected by  
229 the intensity of the test line which can be read on a hand-held densitometer or compared  
230 visually to a scorecard (**Figure 1B**). Strong neutralization results in a weak line because  
231 neutralizing antibodies are binding RBD on green gold beads and preventing RBD-beads from  
232 binding to the ACE2 cellular receptor at the test line.

233

234

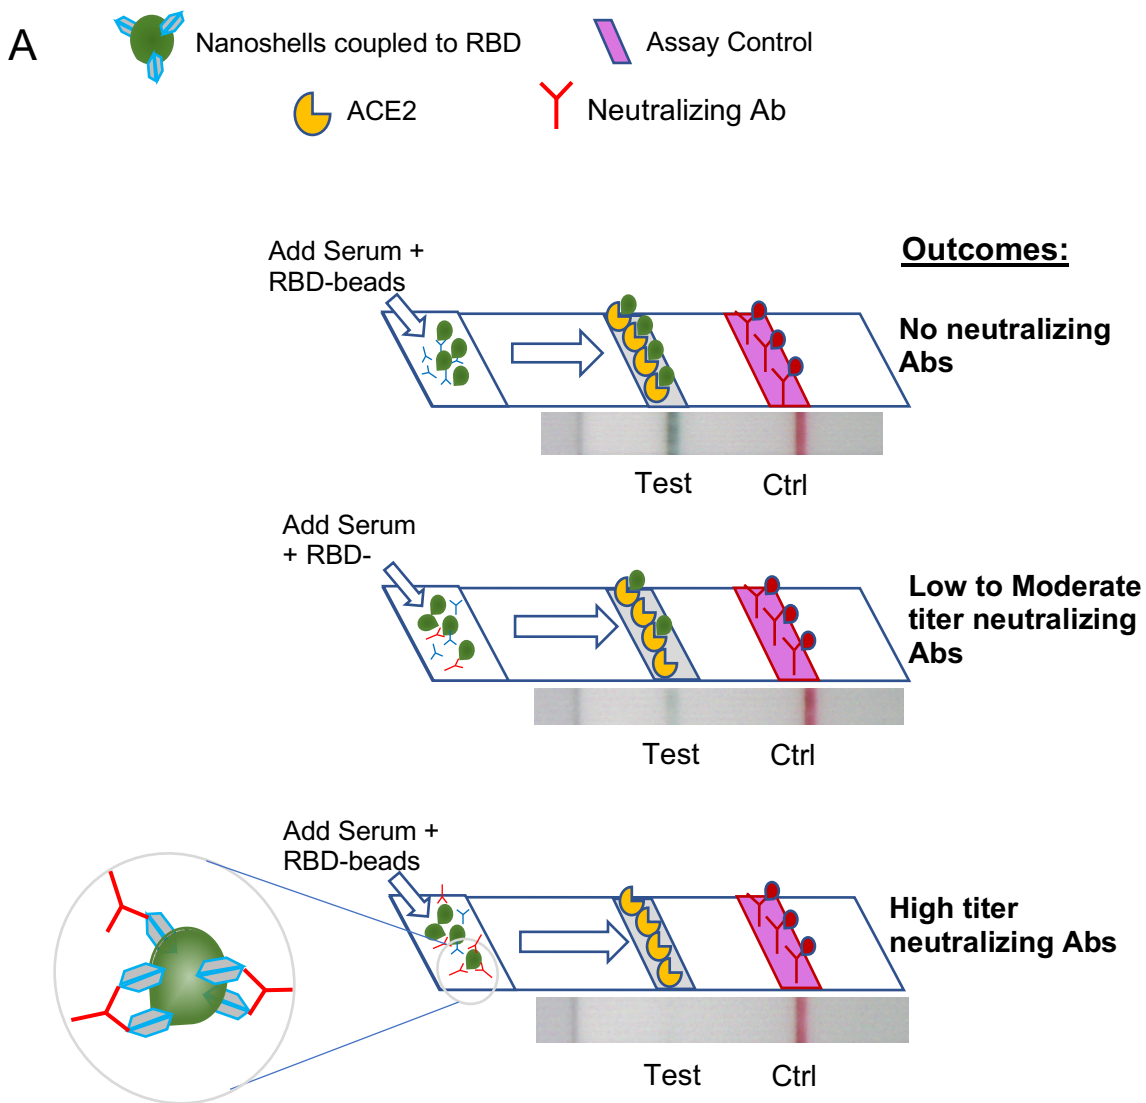

235  
236  
237  
238

239  
240 Density Unit Range: <50,000      50,000-150,000      150,000-450,000      >450,000  
241  
242 Actual Line Density: 10095      132503      317156      645040

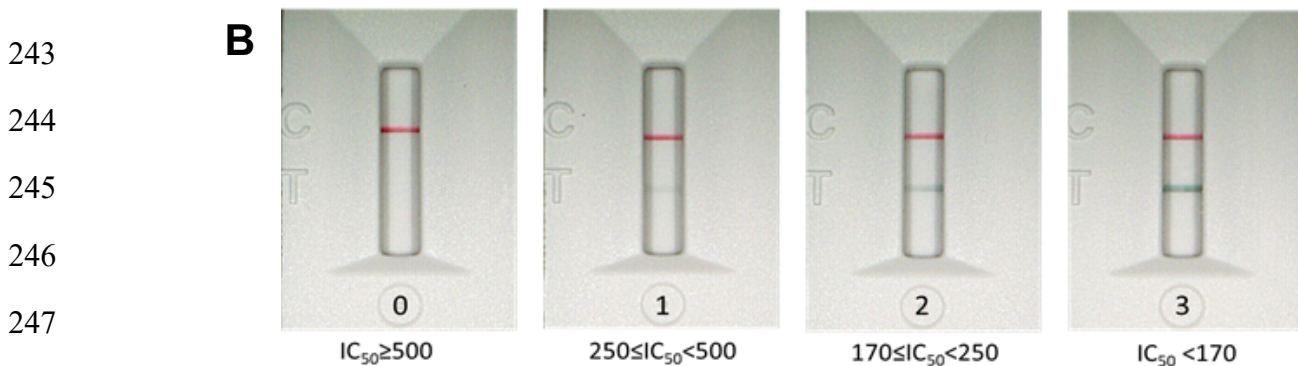

248 **Figure 1.**  
249 **(A)** Schematic of Neutralization LFA. Below each graphic is a representative image of a lateral  
250 flow strip demonstrating actual line density. Addition of non-COVID19-immune serum or plasma  
251 (*top*) does not block binding of RBD-beads (green particles) to ACE2 resulting in the RBD-  
252 bead–ACE2 complex creating a visible line. Addition of patient serum with moderate titer NAbs  
253 to the sample pad creates a weak line (*middle*). Addition of patient serum with high titer NAbs  
254 (> 1:640) blocks binding of RBD-beads to ACE2 such that no line is observed at the test  
255 location on the strip (*bottom*). Red control line represents capture of a mouse monoclonal  
256 antibody coupled to red beads. **(B)** Scorecard for measuring levels of NAbs. Red control line  
257 across from the “C” on the cassette indicates that the test ran properly and the green test line  
258 across from the “T” can be used to measure the ability of plasma or serum to block RBD on gold  
259 nanoshells from binding to ACE2. **(0)** represents patient serum producing a visually non-existent  
260 line with density units of 10,095 and an IC<sub>50</sub>>500 (IC<sub>50</sub>=1151); **(1)** represents patient serum with  
261 a line density of 132,503 and an IC<sub>50</sub> of 396; **(2)** represents patient serum with a line density of  
262 239,987 and an IC<sub>50</sub> of 243; **(3)** represents patient serum with a line density of 485,665 and an  
263 IC<sub>50</sub> of 96.  
264

265 We tested 60 serum samples with known neutralization titers obtained in a VSV-based  
266 spike pseudotype assay in our LFA. De-identified serum samples were sent from Mayo Clinic  
267 Rochester to our laboratories at Mayo Clinic Arizona and run in a blinded manner. The LFA  
268 result compared favorably with serum titers, especially at higher titers and correctly  
269 distinguished all eight non-neutralizing serum samples (**Figure 2A**).

270 To further support the application of our lateral flow test to measure levels of antibodies  
271 that neutralize SARS-CoV-2, we tested a different set of 38 serum samples that were assigned  
272 IC<sub>50</sub> values in an authentic SARS-CoV-2 microneutralization assay(25). Again, the experiment  
273 was performed in a blinded manner such that personnel running either the LFA or the  
274 microneutralization assay did not know the results of the comparator test. When line densities  
275 from the LFA were plotted against IC<sub>50</sub> values determined in the SARS-CoV-2 microneutralization

276 assay, serum samples with strong neutralization activity demonstrated low line densities; this  
277 indicates that neutralizing antibodies inhibited RBD from binding to ACE2 (**Figure 2B**).  
278

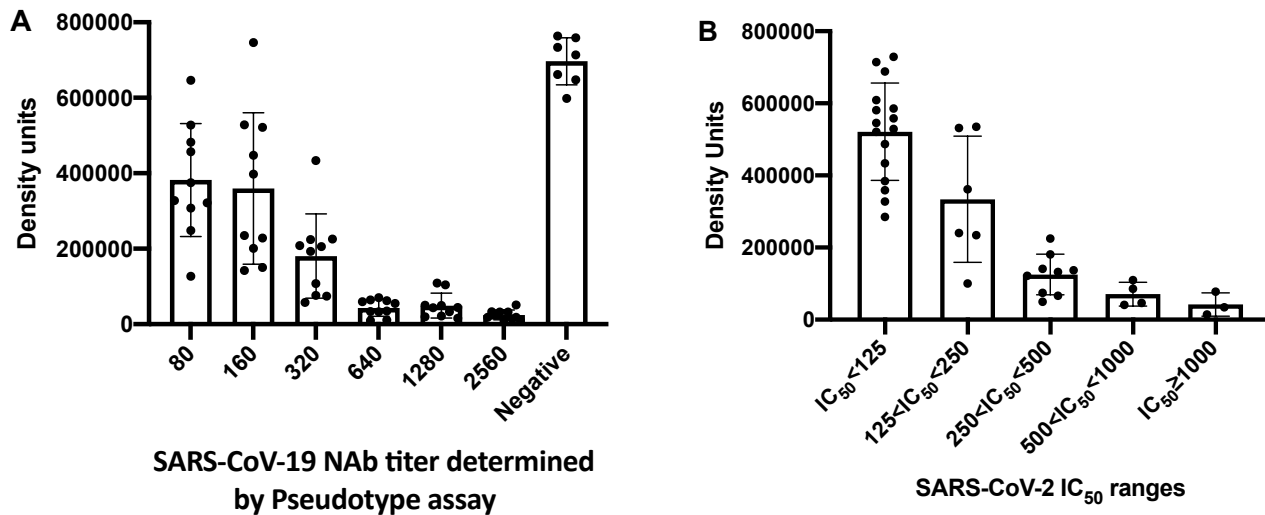

279  
280 **Figure 2. (A)** Comparison of RBD-ACE2 competition LFA Density Units with VSV-Spike  
281 pseudotype virus assay titers using 60 convalescent serum samples. Titters from the  
282 pseudotype assay are shown on the X-axis. Scatter plots with bar graph including standard  
283 deviation of the mean for 10 serum samples at each titer except for negative donor serum which  
284 is eight samples. **(B)** Comparison of RBD-ACE2 competition LFA with IC<sub>50</sub> values determined in  
285 a SARS-CoV-2 microneutralization assay on 38 samples (collected 3 to 90 days after PCR  
286 positive result). Ranges of IC<sub>50</sub> values are shown on the X-axis plotted against LFA line density  
287 units on the Y-axis.  
288

289 Next, we determined if our test detected any neutralization activity in serum samples  
290 collected from patients with other PCR -confirmed respiratory viruses including seasonal  
291 coronaviruses (**Figure 3A**) and for serum samples collected prior to December 2019 (**Figure**  
292 **3B**). None of the seasonal respiratory virus plasma samples, including pre-December 2019  
293 samples showed neutralizing activity.

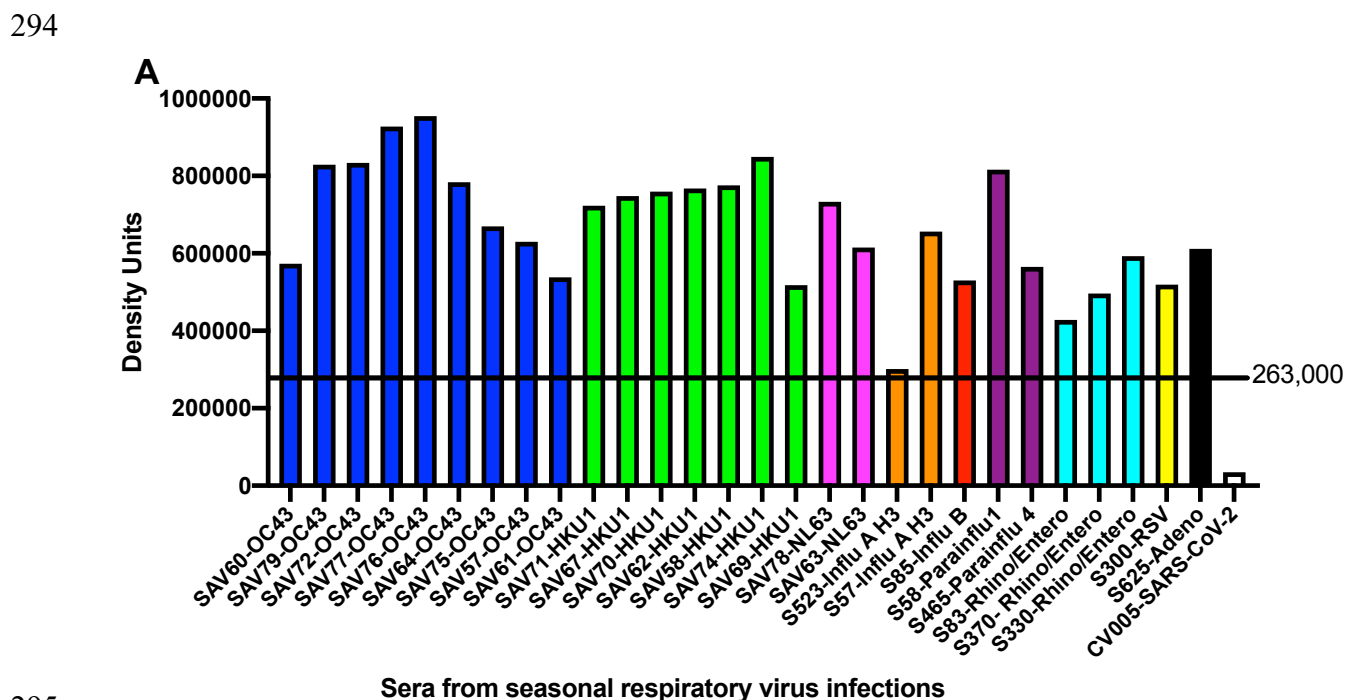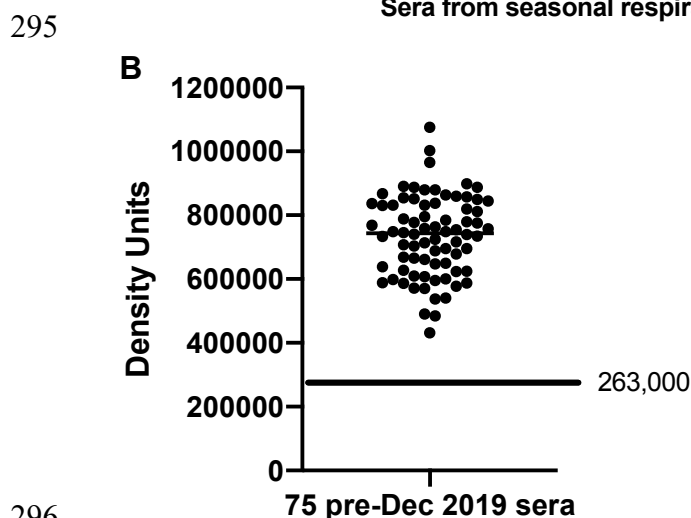

296  
297  
298 **Figure 3. A)** Serum samples collected with PCR-confirmed diagnosis of seasonal respiratory  
299 viruses (Coronavirus OC43, blue; Coronavirus HKU-1, green; Coronavirus NL-63, pink;  
300 influenza A, orange, influenza B, red ; parainfluenza, purple ; rhinovirus, teal ; respiratory  
301 syncytial virus, yellow ; and adenovirus, black) were run on the LFA as described in Methods.

302 A positive control serum from a convalescent COVID-19 patient is shown on the far right of the  
303 bar graph in white. **B)** Serum samples collected pre-December 2019. Cutoff value of 263,000  
304 density units was calculated based on receiver operating characteristic curves (see Figure 6).  
305

306 We evaluated how the Ortho Vitros Anti-SARS-CoV-2 IgG test and our LFA compared to  
307  $IC_{50}$  values determined in an authentic SARS-CoV-2 microneutralization assay using 38 COVID-  
308 19 sera. FDA guidance indicates that an Ortho Vitros Anti-SARS-CoV-2 IgG test of  $\geq 12$  meets a  
309 threshold for convalescent plasma use in patients with COVID-19. To determine the agreement  
310 between our lateral flow assay and the Ortho Vitros Anti-SARS-CoV-2 IgG test, density units from  
311 our LFA and values from the Ortho test were regressed onto  $IC_{50}$  values (**Figure 4**).  
312

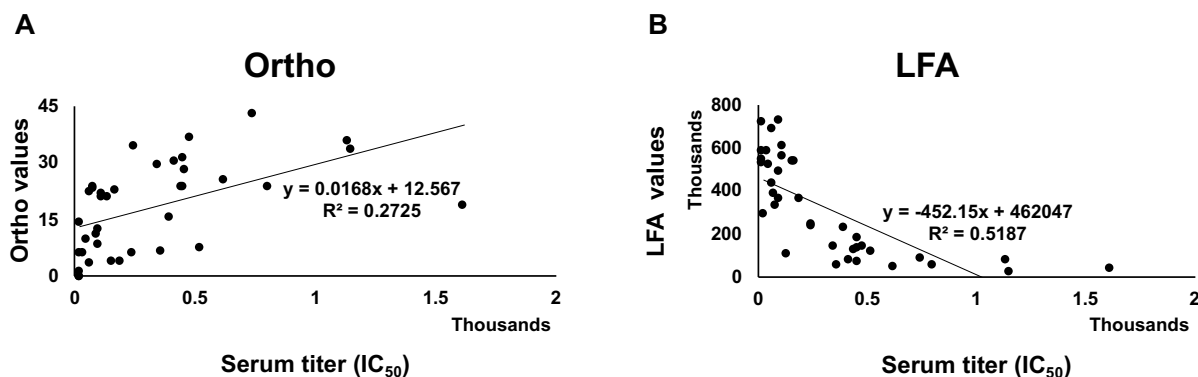

313 **Figure 4.** Regression analysis between **(A)** LFA and serum titer, and **(B)** Ortho Vitros SARS-  
314 CoV-2 IgG test and titer. Regression plots show explained variance ( $R^2$ ) between compared  
315 methods. Thirty-eight samples were tested.  
316  
317

318 LFA values accounted for roughly 52% of observed variance in  $IC_{50}$  values, while Ortho  
319 Vitros Anti-SARS-CoV-2 IgG test accounted for approximately 27% of  $IC_{50}$  variance. Since the  
320 format of the LFA reports decreasing density values as neutralization increases, LFA was  
321 significantly inversely correlated with  $IC_{50}$  values ( $r = -0.720$ ,  $p < 0.001$ ), while Ortho Vitros Anti-  
322 SARS-CoV-2 IgG test values showed a significant positive correlation to  $IC_{50}$  values ( $r = 0.522$ ,  $p$   
323  $= 0.001$ ). Additionally, LFA and Ortho Vitros Anti-SARS-CoV-2 IgG test values showed a  
324 significant relationship with each other ( $r = -0.572$ ,  $p < 0.001$ ).

325 To evaluate bias between the assays, mean differences and 95% confidence intervals  
326 (CIs) were calculated and plotted alongside limits of agreement (**Figure 5**). Both LFA and Ortho  
327 Vitros Anti-SARS-CoV-2 IgG test values showed high agreement with titer, although Ortho Vitros  
328 Anti-SARS-CoV-2 IgG test showed a tendency to underestimate neutralizing capacity while the  
329 LFA method showed no bias.  
330

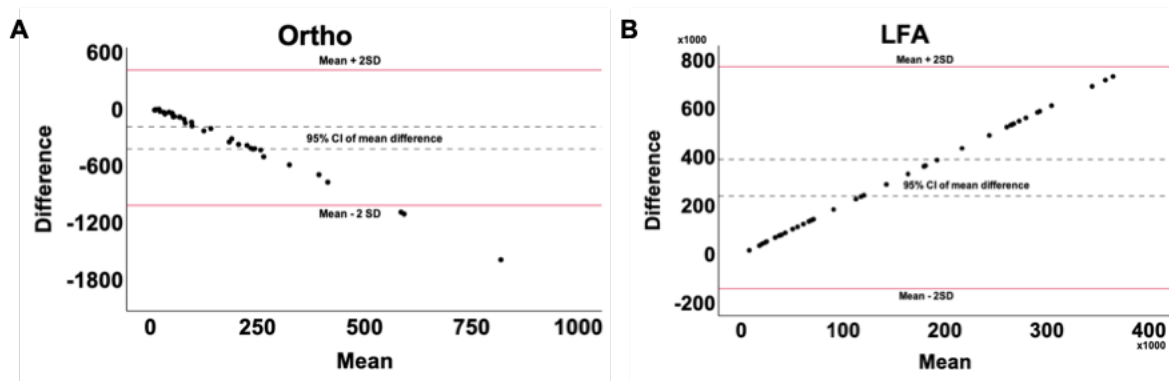

331  
332 **Figure 5.** Bland-Altman plots showing bias (mean difference and 95% CI) and computed limits  
333 of agreement (mean difference  $\pm$  2SD) between **(A)** Ortho Vitros Anti-SARS-CoV-2 IgG test and  
334 IC<sub>50</sub> values and **(B)** our LFA and IC<sub>50</sub> values. Thirty-eight samples were tested.  
335

336 Univariate ROC analysis was performed to assess the performance of the newly  
337 developed LFA and Ortho assay to classify non-neutralizing (Neg—1:160), and neutralizing  
338 groups ( $\geq$ 1:320) (**Figure 6**). As can be seen in **Figure 6B** and **6D**, the LFA misclassified one non-  
339 neutralizing sample (Neg—1:160) as neutralizing ( $\geq$ 1:320). In contrast, Ortho Vitros Anti-SARS-  
340 CoV-2 IgG test misclassified that same non-neutralizing sample as neutralizing, in addition to  
341 incorrectly classifying five additional neutralizing samples as non-neutralizing. Importantly, our  
342 LFA method exhibited a greater dynamic range of differential values as compared to Ortho's test.  
343 (**Figure 5**), translating to superior classification accuracy of the LFA method in detecting  
344 neutralizing samples (titer  $\geq$  1:320) compared to Ortho Vitros Anti-SARS-CoV-2 IgG test (**Figures**  
345 **6A** and **6C**).  
346

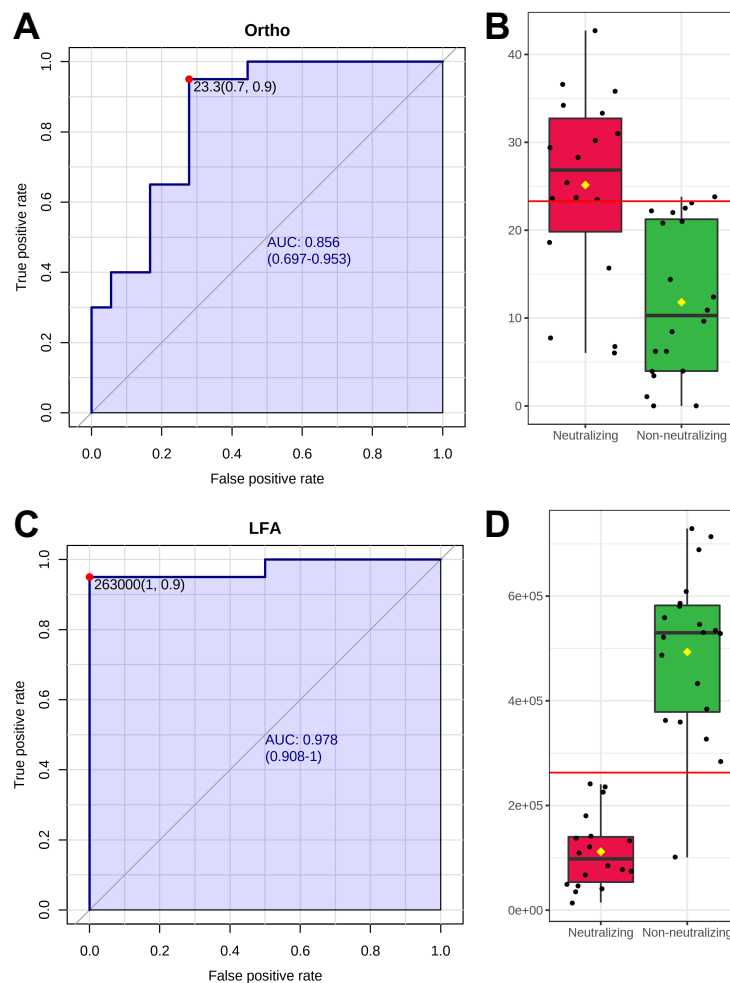

347

348 **Figure 6. (A)** Univariate ROC analysis of Ortho Vitros Anti-SARS-CoV-2 IgG test for  
349 discrimination of neutralizing samples ( $\geq 1:320$ ) [AUC: 0.856, 95% CI: 0.697—0.953, sensitivity =  
350 0.7, specificity = 0.9]. **(B)** Box plot of Ortho Vitros Anti-SARS-CoV-2 IgG test values between  
351 neutralizing ( $\geq 1:320$ ) and non-neutralizing (Neg—1:160) groups. **(C)** Univariate ROC analysis of  
352 LFA for discrimination of neutralizing samples ( $\geq 1:320$ ) [AUC: 0.978, 95% CI: 0.908—1.0,  
353 sensitivity = 1.0, specificity = 0.9]. **(D)** Box plot of LFA values between neutralizing ( $\geq 1:320$ ) and  
354 non-neutralizing (Neg—1:160) groups.

355

356

357

358 Our LFA showed high accuracy for classification of neutralizing samples (AUC = 0.978),  
359 while the Ortho Vitros Anti-SARS-CoV-2 IgG test showed modest accuracy for classification of  
360 neutralizing samples (AUC = 0.856). Furthermore, while the LFA method showed a narrow  
361 confidence interval (95% CI: 0.908—1.00), ROC analysis of Ortho Vitros Anti-SARS-CoV-2 IgG  
362 test values showed a wider range (95% CI: 0.697—0.953), indicating less certainty. Notably, while  
both methods showed roughly 90% specificity, Ortho Vitros Anti-SARS-CoV-2 IgG test Vitros Anti-



363 SARS-CoV-2 IgG test showed only 70% sensitivity. In contrast, the novel LFA method showed  
364 perfect sensitivity (100%) in this analysis of 38 samples.

365 Optimal cutoffs were computed to maximize AUC. For the LFA, density unit values below  
366 263,000 classify samples as neutralizing and correspond to titers  $\geq 1:320$ . Density unit values  
367 above this LFA cutoff classify samples in the non-neutralizing group. For the Ortho Vitros Anti-  
368 SARS-CoV-2 IgG test, values between 0 and 23.3 were representative of non-neutralizing  
369 capacity, whereas values above 23.3 were reflective of the neutralizing group. If we used the  
370 FDA cutoff of 12 instead of the 23.3 value calculated using our results, AUC would be reduced to  
371 0.69 (sensitivity = 0.55, specificity = 0.83).

372 Polyclonal antisera was used in this study, not an individual Mab, so the limit of detection  
373 (LoD) does not exactly apply). However, we can calculate the LoD by line density based on the  
374 method of Armbruster and Pry(26) as the highest line density from samples still containing  
375 neutralizing antibodies and distinguishable from blank except that the operand sign was changed  
376 because due to the competitive format of the LFA:  $LoD = \text{limit of blank (LoB)} - (1.65 * SD_{\text{low conc}}$   
377  $_{\text{sample}})$ :  $LoD = 1,047,382 - (1.65 * 63,769) = 942,481$  Test Line Density Units. The average line  
378 density observed for the top 10 donors who demonstrated the strongest ability to prevent RBD  
379 from binding to ACE2 was 20,706.

380 The principle of infusing convalescent plasma from recovered individuals into patients  
381 fighting COVID-19 is to transfer NABs from the donor to the recipient, as has been done for  
382 several other diseases(27–29). The rapid test described here, could quickly and efficiently  
383 classify COVID-19 convalescent plasma (CCP) units so that the sickest patients might receive  
384 the most potently neutralizing plasma. Although levels of neutralizing antibody to achieve in  
385 patients receiving CCP remains undefined, our point-of-care test might be useful at the bedside  
386 to monitor a patient receiving highly neutralizing CCP as he/she begins to demonstrate NABs in  
387 circulation, as shown in **Figure 7A**. It could help in deciding whether to administer another unit

388 of highly neutralizing CCP to a patient fighting COVID19. The same scenario might also be  
389 applied to hyperimmune gammaglobulin or neutralizing monoclonal antibody infusion.

390 To demonstrate the utility of our LFA to measure NAbs in whole blood, we used a lateral  
391 flow strip with a blood filter and performed an experiment in which a neutralizing monoclonal  
392 antibody based on the B-38(20) sequence was titrated into whole blood as shown in **Figure 7B**.  
393 Density units were not obtained in these experiments but both **Figures 7A** and **7B** demonstrate  
394 the semi-quantitative nature of this test to visually distinguish different levels of NAbs in plasma  
395 and whole blood.

396

397

398

399

400

401

402

403

404

405

406

407

408

409

410

411

412

413

414

415

416

417

418

419

420

421

422

423

424

425

426

427

428

429

430

431

432

433

434

435

436

437

438

439

440

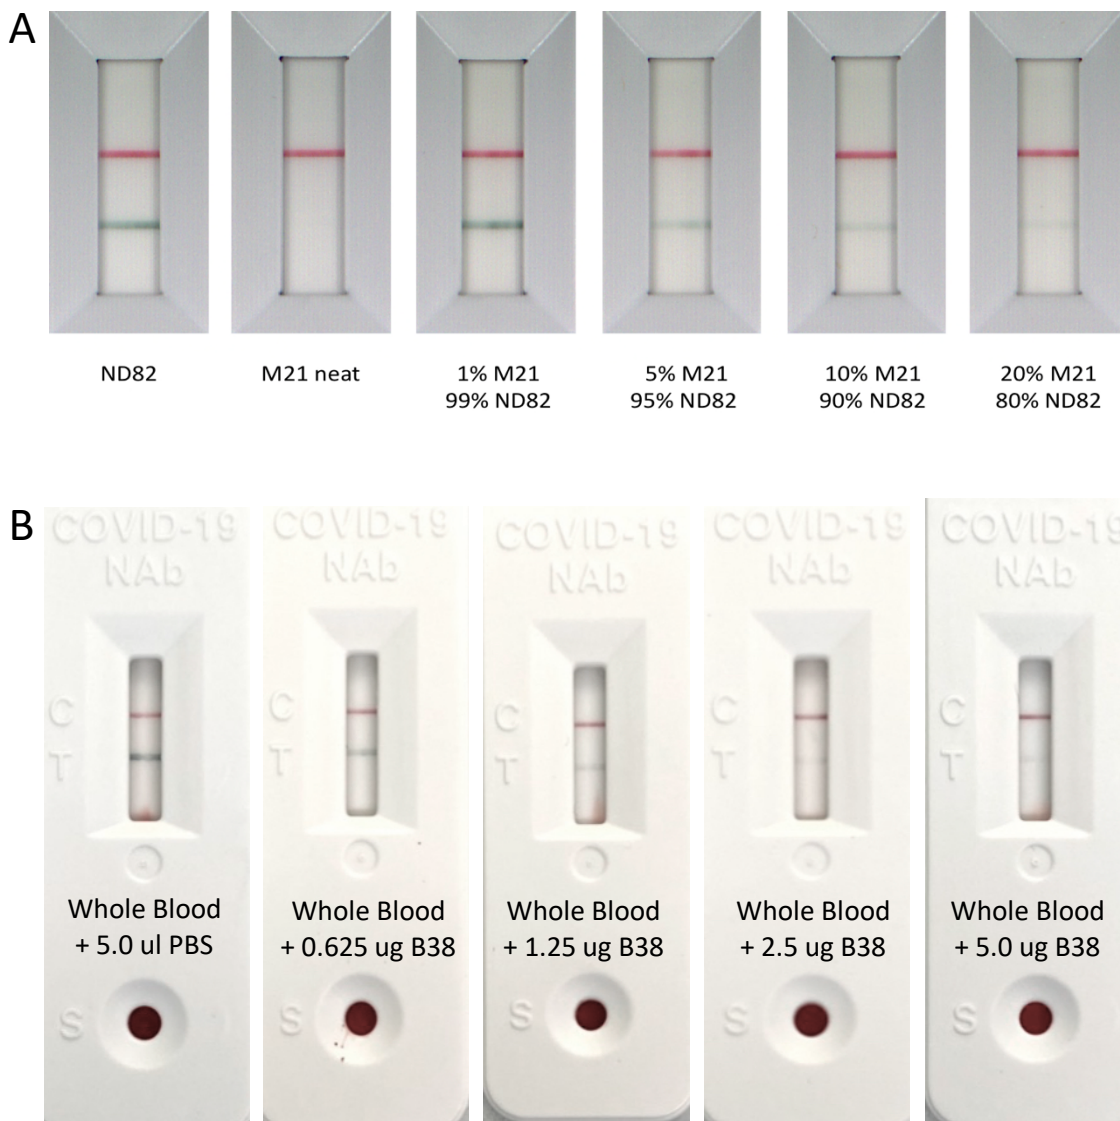

**Figure 7. (A)** Highly neutralizing plasma from an individual recovered from COVID-19 (M21) converts non-immune human plasma (ND82) into highly neutralizing plasma; 10 $\mu$ l of plasma was added to each lateral flow cassette. Text below each lateral flow cassette indicates the percent M21 and percent ND82 plasma used to run the lateral flow test. **(B)** Titration of anti-RBD neutralizing mAb into 10 $\mu$ l of heparinized whole blood. For both types of cassettes, plasma or blood sample was immediately chased with 50 $\mu$ l sample buffer. Densities were read and cassettes were imaged after 10 minutes development.

## Discussion

Serologic tests that detect responses to infection are an important population surveillance tool during pandemics because they provide data on pathogen exposure, especially

441 when a subset of the population is asymptomatic and would not have been diagnosed by  
442 molecular methods(30, 31). While over 90% of individuals diagnosed with COVID-19 generate  
443 antibody responses(30) we are only beginning to learn about the prevalence and duration of  
444 NABs induced by a natural infection. This lack of knowledge is mainly due to the fact that virus-  
445 based neutralization assays require *i)* BSL2 or BSL3 facilities, *ii)* highly skilled personnel, *iii)*  
446 permissive cells and quantified virus, and *iv)* take longer than 24 hours to obtain results. Since  
447 every viral vaccine, including COVID-19 vaccines, administered to humans is designed to elicit  
448 antibodies that neutralize virus by blocking host cell infection, development of NABs is a  
449 hallmark of protection from disease. Therefore, there is a need for rapid, accurate tests that  
450 measure levels of NABs. Furthermore, in a post-vaccine world, longitudinal measurement of  
451 protective, neutralizing antibodies is crucial. Measurement of anti-viral T cells also indicates that  
452 infected individuals could destroy infected host cells if virus escapes neutralization.

453 We developed a rapid, 10-minute lateral flow test that measures levels of NABs in serum  
454 and plasma. As shown in **Figure 2**, the lateral flow test correlates well with serologic titers  
455 determined using a VSV-based pseudotype assay, and IC<sub>50</sub> values in an authentic SARS-CoV-2  
456 microneutralization assay, especially when serum sample titers are ≥640 and IC<sub>50</sub> values  
457 are >250. Samples with less potent NABs in both viral assays correlated with decreased ability  
458 to block RBD from binding to ACE2 in the LFAs.

459 The LFA and Ortho Vitros Anti-SARS-CoV-2 IgG test methods showed a strong,  
460 significant correlation with each other ( $r = -0.572$ ,  $p < 0.001$ ), displaying an appreciable degree of  
461 linear relation ( $r = -0.720$ ,  $p < 0.001$ )(32). Importantly, LFA accounts for 52% of observed IC<sub>50</sub>  
462 variance ( $R^2 = 0.5187$ ) while, in comparison, Ortho Vitros Anti-SARS-CoV-2 IgG test accounts for  
463 27% ( $R^2 = 0.2725$ ). Although absolute quantitation of a construct demands an excellent coefficient  
464 of determination ( $R^2 \geq 0.99$ )(33), variables with  $R^2 \geq 0.5$  are highly predictive in univariate  
465 regression models while measures with  $R^2 < 0.5$  are recommended for use in multivariate models  
466 in combination with complementary measures to increase predictive accuracy(34, 35).

467 Additionally, Bland-Altman analysis (**Figure 5**) showed the Ortho Vitros Anti-SARS-CoV-2 IgG  
468 test to be prone to underestimation of IC<sub>50</sub> values. In contrast, the LFA method did not exhibit any  
469 over- or underestimation bias. Furthermore, across mean values for both methods, LFA showed  
470 discrete differential values while Ortho Vitros Anti-SARS-CoV-2 IgG test struggled to differentiate  
471 samples with high neutralizing capacity (IC<sub>50</sub> values).

472

473         Since the Ortho Vitros Anti-SARS-CoV-2 IgG test uses S1, which includes RBD, it is  
474 likely that antibodies reactive with other parts of S1—even some that may neutralize via N-  
475 terminal domain—are responsible for increased reactivity to S1 when they are not neutralizing in  
476 our RBD-ACE2 competition assay. Advantages of our POC test is that it can be inexpensively  
477 and rapidly deployed in studies to determine levels of NABs that protect against re-infection and  
478 limit transmission of the virus. Moreover, rapid inexpensive tests can be used longitudinally to  
479 evaluate duration of protective immunity in both naturally infected and many more vaccinated  
480 individuals than could ever be evaluated using BSL2 or BSL3-based neutralization assays.

481

482         In the setting of much debated CCP, a rapid test could be used to measure levels of  
483 NABs in a CCP product prior to infusion, or potential donors who recovered from COVID-19.  
484 During infusion of CCP, a rapid test could be used to help decide if a patient fighting COVID-19  
485 requires another unit of highly neutralizing plasma. If a particular donor's CCP has very high  
486 levels of CCP, patients might need only one unit. On the other hand, if donor CCP contains  
487 moderate levels of NABs, the patient may require multiple units to achieve therapeutic levels of  
488 NABs. However, since we do not know what an adequate therapeutic dose of NABs is, this  
489 rapid test could be a valuable tool in trials to determine under what conditions CCP,  
490 hyperimmune globulin, and neutralizing mAbs are effective therapeutic agents for COVID19  
491 patients.

492

493           Limitations of the LFA are that it uses only the RBD portion of SARS-CoV-2 spike  
494 protein. Although the vast majority of reports indicate that the principle neutralizing domain is  
495 RBD portion of spike protein, mAbs have been reported that neutralize SARS-CoV-2 by binding  
496 to the N-terminal domain of spike protein(36, 37). Also, since the spike protein assumes several  
497 conformations during viral binding and entry(38), neutralizing epitopes exist on the quaternary  
498 structure of spike(37). Although RBDs on the nanoparticles may associate, it is unlikely they  
499 assume a native quaternary conformation.

500           Other limitations are the binary nature of the data analysis (neutralizing and non-  
501 neutralizing) of a continuous assay. Clearly, line densities demonstrate moderate levels of  
502 neutralization. Since blood draws and subsequent assays are a “snapshot in time” of  
503 neutralizing antibody activity, levels were undoubtedly increasing in some patients and  
504 decreasing in others. LFAs are generally inexpensive and highly portable compared to other  
505 laboratory-based tests, so neutralizing antibody levels could be measured using the LFA to  
506 longitudinally assess protective neutralizing antibody immunity. Another limitation is that the  
507 LFA does not differentiate high affinity anti-RBD NABs from an abundance of lower affinity anti-  
508 RBD NABs. In related experiments, we have observed patient sera that bind strongly to RBD,  
509 but do not demonstrate neutralizing activity (data not shown).

510           This test may prove very useful in monitoring COVID-19 vaccine recipients. Although  
511 vaccines have now been approved for distribution and administration, durability of protective  
512 immunity elicited by any COVID-19 vaccine is unknown. It is the goal of all COVID-19 vaccines  
513 to induce protective NABs. However, since clinical trials of vaccines have enrolled 30,000 to  
514 60,000 participants, it is not logistically possible to draw a tube of blood from each vaccine  
515 recipient longitudinally to determine duration of protective NABs. Application of our test in  
516 vaccine recipients using a drop of blood obtained from a finger-stick as shown in **Figure 7B**  
517 might lead to more comprehensive longitudinal monitoring of increases and decreases in  
518 protective humoral immunity.

519

520 **Data availability**

521 The authors declare that data supporting the findings of this study are available within the  
522 paper. Additional data mentioned but not shown are available from the corresponding author  
523 upon reasonable request.

524

525 **References**

- 526 1. Ghinai I, McPherson TD, Hunter JC, Kirking HL, Christiansen D, Joshi K, Rubin R, Morales-Estrada S,  
527 Black SR, Pacilli M, Fricchione MJ, Chugh RK, Walblay KA, Ahmed NS, Stoecker WC, Hasan NF,  
528 Burdsall DP, Reese HE, Wallace M, Wang C, Moeller D, Korpics J, Novosad SA, Benowitz I, Jacobs  
529 MW, Dasari VS, Patel MT, Kauerauf J, Charles EM, Ezike NO, Chu V, Midgley CM, Rolfes MA, Gerber  
530 SI, Lu X, Lindstrom S, Verani JR, Layden JE, Brister S, Goldesberry K, Hoferka S, Jovanov D, Nims D,  
531 Saathoff-Huber L, Hoskin Snelling C, Adil H, Ali R, Andreychak E, Bemis K, Frias M, Quartey-  
532 Kumapley P, Baskerville K, Murphy E, Murskyj E, Noffsinger Z, Vercillo J, Elliott A, Onwuta US, Burck  
533 D, Abedi G, Burke RM, Fagan R, Farrar J, Fry AM, Hall AJ, Haynes A, Hoff C, Kamili S, Killerby ME,  
534 Kim L, Kujawski SA, Kuhar DT, Lynch B, Malapati L, Marlow M, Murray JR, Rha B, Sakthivel SKK,  
535 Smith-Jeffcoat SE, Soda E, Wang L, Whitaker BL, Uyeki TM. 2020. First known person-to-person  
536 transmission of severe acute respiratory syndrome coronavirus 2 (SARS-CoV-2) in the USA. The  
537 Lancet 395:1137–1144.
- 538 2. Huang C, Wang Y, Li X, Ren L, Zhao J, Hu Y, Zhang L, Fan G, Xu J, Gu X, Cheng Z, Yu T, Xia J, Wei Y, Wu  
539 W, Xie X, Yin W, Li H, Liu M, Xiao Y, Gao H, Guo L, Xie J, Wang G, Jiang R, Gao Z, Jin Q, Wang J, Cao  
540 B. 2020. Clinical features of patients infected with 2019 novel coronavirus in Wuhan, China. The  
541 Lancet 395:497–506.

- 542 3. Li R, Pei S, Chen B, Song Y, Zhang T, Yang W, Shaman J. 2020. Substantial undocumented infection  
543 facilitates the rapid dissemination of novel coronavirus (SARS-CoV-2). *Science* 368:489–493.
- 544 4. Widge AT, Roupael NG, Jackson LA, Anderson EJ, Roberts PC, Makhene M, Chappell JD, Denison  
545 MR, Stevens LJ, Pruijssers AJ, McDermott AB, Flach B, Lin BC, Doria-Rose NA, O’Dell S, Schmidt SD,  
546 Neuzil KM, Bennett H, Leav B, Makowski M, Albert J, Cross K, Edara V-V, Floyd K, Suthar MS,  
547 Buchanan W, Luke CJ, Ledgerwood JE, Mascola JR, Graham BS, Beigel JH. 2020. Durability of  
548 Responses after SARS-CoV-2 mRNA-1273 Vaccination. *N Engl J Med* 4.
- 549 5. Loeffelholz MJ, Tang Y-W. 2020. Laboratory diagnosis of emerging human coronavirus infections –  
550 the state of the art. *Emerg Microbes Infect* 9:747–756.
- 551 6. Yongchen Z, Shen H, Wang X, Shi X, Li Y, Yan J, Chen Y, Gu B. 2020. Different longitudinal patterns of  
552 nucleic acid and serology testing results based on disease severity of COVID-19 patients. *Emerg*  
553 *Microbes Infect* 9:833–836.
- 554 7. McAndrews KM, Dowlatshahi DP, Hensel J, Ostrosky-Zeichner LL, Papanna R, LeBleu VS, Kalluri R.  
555 2020. Identification of IgG antibody response to SARS-CoV-2 spike protein and its receptor binding  
556 domain does not predict rapid recovery from COVID-19. preprint, *Infectious Diseases (except*  
557 *HIV/AIDS)*.
- 558 8. Han Z, Battaglia F, Terlecky SR. 2020. Discharged COVID-19 Patients Testing Positive Again for SARS-  
559 CoV-2 RNA: A Minireview of Published Studies from China. *J Med Virol* jmv.26250.
- 560 9. Ye G, Pan Z, Pan Y, Deng Q, Chen L, Li J, Li Y, Wang X. 2020. Clinical characteristics of severe acute  
561 respiratory syndrome coronavirus 2 reactivation. *J Infect* 80:e14–e17.



- 562 10. Hoang VT, Dao TL, Gautret P. 2020. Recurrence of positive SARS-CoV-2 in patients recovered from  
563 COVID-19. *J Med Virol* jmv.26056.
- 564 11. Robbiani DF, Gaebler C, Muecksch F, Lorenzi JCC, Wang Z, Cho A, Agudelo M, Barnes CO, Gazumyan  
565 A, Finkin S, Hagglof T, Oliveira TY, Viant C, Hurley A, Hoffmann H-H, Millard KG, Kost RG, Cipolla M,  
566 Gordon K, Bianchini F, Chen ST, Ramos V, Patel R, Dizon J, Shimeliovich I, Mendoza P, Hartweger H,  
567 Nogueira L, Pack M, Horowitz J, Schmidt F, Weisblum Y, Michailidis E, Ashbrook AW, Waltari E, Pak  
568 JE, Huey-Tubman KE, Koranda N, Hoffman PR, West AP, Rice CM, Hatzioannou T, Bjorkman PJ,  
569 Bieniasz PD, Caskey M, Nussenzweig MC. 2020. Convergent Antibody Responses to SARS-CoV-2  
570 Infection in Convalescent Individuals. preprint, *Immunology*.
- 571 12. Juno JA, Tan H-X, Lee WS, Reynaldi A, Kelly HG, Wragg K, Esterbauer R, Kent HE, Batten CJ, Mordant  
572 FL, Gherardin NA, Pymm P, Dietrich MH, Scott NE, Tham W-H, Godfrey DI, Subbarao K, Davenport  
573 MP, Kent SJ, Wheatley AK. 2020. Immunogenic profile of SARS-CoV-2 spike in individuals recovered  
574 from COVID-19. preprint, *Infectious Diseases (except HIV/AIDS)*.
- 575 13. Wu F, Wang A, Liu M, Wang Q, Chen J, Xia S, Ling Y, Zhang Y, Xun J, Lu L, Jiang S, Lu H, Wen Y, Huang  
576 J. 2020. Neutralizing antibody responses to SARS-CoV-2 in a COVID-19 recovered patient cohort  
577 and their implications. *MedRxiv Prepr* 20.
- 578 14. Vandergaast R, Carey T, Reiter S, Lech P, Gnanadurai C, Tesfay M, Buehler J, Suksanpaisan L, Naik S,  
579 Brunton B, Recker J, Haselton M, Ziegler C, Roesler A, Mills JR, Theel E, Weaver SC, Rafael G,  
580 Roforth MM, Jerde C, Tran S, Diaz RM, Bexon A, Baum A, Kyratsous CA, Peng KW, Russell SJ. 2020.  
581 Development and validation of IMMUNO-COV™: a high-throughput clinical assay for detecting  
582 antibodies that neutralize SARS-CoV-2. preprint, *Immunology*.

- 583 15. Crawford KHD, Eguia R, Dingens AS, Loes AN, Malone KD, Wolf CR, Chu HY, Tortorici MA, Veessler D,  
584 Murphy M, Pettie D, King NP, Balazs AB, Bloom JD. 2020. Protocol and reagents for pseudotyping  
585 lentiviral particles with SARS-CoV-2 Spike protein for neutralization assays. preprint, Microbiology.
- 586 16. Wang Q, Zhang Y, Wu L, Niu S, Song C, Zhang Z, Lu G, Qiao C, Hu Y, Yuen K-Y, Wang Q, Zhou H, Yan J,  
587 Qi J. 2020. Structural and Functional Basis of SARS-CoV-2 Entry by Using Human ACE2. Cell  
588 S009286742030338X.
- 589 17. Premkumar L, Segovia-Chumbez B, Jadi R, Martinez DR, Raut R, Markmann A, Cornaby C, Bartelt L,  
590 Weiss S, Park Y, Edwards CE, Weimer E, Scherer EM, Roupheal N, Edupuganti S, Weiskopf D, Tse  
591 LV, Hou YJ, Margolis D, Sette A, Collins MH, Schmitz J, Baric RS, de Silva AM. 2020. The receptor  
592 binding domain of the viral spike protein is an immunodominant and highly specific target of  
593 antibodies in SARS-CoV-2 patients. Sci Immunol 5:eabc8413.
- 594 18. Tan CW, Chia WN, Qin X, Liu P, Chen MI-C, Tiu C, Hu Z, Chen VC-W, Young BE, Sia WR, Tan Y-J, Foo R,  
595 Yi Y, Lye DC, Anderson DE, Wang L-F. 2020. A SARS-CoV-2 surrogate virus neutralization test based  
596 on antibody-mediated blockage of ACE2–spike protein–protein interaction. Nat Biotechnol  
597 <https://doi.org/10.1038/s41587-020-0631-z>.
- 598 19. Hanson QM, Wilson KM, Shen M, Itkin Z, Eastman RT, Shinn P, Hall MD. 2020. Targeting ACE2-RBD  
599 interaction as a platform for COVID19 therapeutics: Development and drug repurposing screen of  
600 an AlphaLISA proximity assay. preprint, Biochemistry.
- 601 20. Wu Y, Wang F, Shen C, Peng W, Li D, Zhao C, Li Z, Li S, Bi Y, Yang Y, Gong Y, Xiao H, Fan Z, Tan S, Wu  
602 G, Tan W, Lu X, Fan C, Wang Q, Liu Y, Zhang C, Qi J, Gao GF, Gao F, Liu L. 2020. A noncompeting  
603 pair of human neutralizing antibodies block COVID-19 virus binding to its receptor ACE2. Science  
604 368:1274–1278.

- 605 21. Davide Giavarina. 2015. Understanding Bland Altman analysis. *Biochem Medica* 25:141–151.
- 606 22. Doğan NÖ. 2018. Bland-Altman analysis: A paradigm to understand correlation and agreement. *Turk*  
607 *J Emerg Med* 18:139–141.
- 608 23. Obuchowski NA, Bullen JA. 2018. Receiver operating characteristic (ROC) curves: review of methods  
609 with applications in diagnostic medicine. *Phys Med Biol* 29.
- 610 24. Nakas CT, Yannoutsos CT. November 30. Ordered multiple-class ROC analysis with continuous  
611 measurements. *Med Stat* 23:3437–49.
- 612 25. Xie X, Muruato A, Lokugamage KG, Narayanan K, Zhang X, Zou J, Liu J, Schindewolf C, Bopp NE,  
613 Aguilar PV, Plante KS, Weaver SC, Makino S, LeDuc JW, Menachery VD, Shi P-Y. 2020. An Infectious  
614 cDNA Clone of SARS-CoV-2. *Cell Host Microbe* 27:841-848.e3.
- 615 26. Armbruster DA, Pry T. Limit of Blank, Limit of Detection and Limit of Quantitation. 2008 *Clin*  
616 *Biochem Rev* 29:s50.
- 617 27. Leider JP, Brunker PAR, Ness PM. 2010. Convalescent transfusion for pandemic influenza: preparing  
618 blood banks for a new plasma product?: CONVALESCENT TRANSFUSION FOR PANDEMIC  
619 INFLUENZA. *Transfusion (Paris)* 50:1384–1398.
- 620 28. Yeh K-M, Chiueh T-S, Siu LK, Lin J-C, Chan PKS, Peng M-Y, Wan H-L, Chen J-H, Hu B-S, Perng C-L, Lu J-  
621 J, Chang F-Y. 2005. Experience of using convalescent plasma for severe acute respiratory syndrome  
622 among healthcare workers in a Taiwan hospital. *J Antimicrob Chemother* 56:919–922.
- 623 29. Enria D, Briggiler A, Fernandez N, Levis S, Maiztegui J. 1984. Importance of dose of neutralising  
624 antibodies in treatment of Argentine Haemorrhagic Fever with immune plasma. *The Lancet* 255–  
625 256.

- 626 30. Gudbjartsson DF, Norddahl GL, Melsted P, Gunnarsdottir K, Holm H, Eythorsson E, Arnthorsson AO,  
627 Helgason D, Bjarnadottir K, Ingvarsson RF, Thorsteinsdottir B, Kristjansdottir S, Birgisdottir K,  
628 Kristinsdottir AM, Sigurdsson MI, Arnadottir GA, Ivarsdottir EV, Andresdottir M, Jonsson F,  
629 Agustsdottir AB, Berglund J, Eiriksdottir B, Fridriksdottir R, Gardarsdottir EE, Gottfredsson M,  
630 Gretarsdottir OS, Gudmundsdottir S, Gudmundsson KR, Gunnarsdottir TR, Gylfason A, Helgason A,  
631 Jensson BO, Jonasdottir A, Jonsson H, Kristjansson T, Kristinsson KG, Magnúsdottir DN, Magnússon  
632 OT, Olafsdottir LB, Rognvaldsson S, le Roux L, Sigmundsdottir G, Sigurdsson A, Sveinbjornsson G,  
633 Sveinsdottir KE, Sveinsdottir M, Thorarensen EA, Thorbjornsson B, Thordardottir M,  
634 Saemundsdottir J, Kristjansson SH, Josefsdottir KS, Masson G, Georgsson G, Kristjansson M, Moller  
635 A, Palsson R, Gudnason T, Thorsteinsdottir U, Jonsdottir I, Sulem P, Stefansson K. 2020. Humoral  
636 Immune Response to SARS-CoV-2 in Iceland. *N Engl J Med* NEJMoa2026116.
- 637 31. Lee S, Kim T, Lee E, Lee C, Kim H, Rhee H, Park SY, Son H-J, Yu S, Park JW, Choo EJ, Park S, Loeb M,  
638 Kim TH. 2020. Clinical Course and Molecular Viral Shedding Among Asymptomatic and  
639 Symptomatic Patients With SARS-CoV-2 Infection in a Community Treatment Center in the  
640 Republic of Korea. *JAMA Intern Med* <https://doi.org/10.1001/jamainternmed.2020.3862>.
- 641 32. Schober P, Boer C, Schwarte LA. 2018. Correlation Coefficients: Appropriate Use and Interpretation.  
642 *Anesth Analg* 126:1763–1768.
- 643 33. Rights JD, Sterba SK. Quantifying explained variance in multilevel models: An integrative framework  
644 for defining R-squared measures. *Psychol Methods* 24:309–338.
- 645 34. Rights JD, Sterba SK. A framework of R-squared measures for single-level and multilevel regression  
646 mixture models. *Psychol Methods* 23:434–457.

- 647 35. Rights JD, Sterba SK. New Recommendations on the Use of R-Squared Differences in Multilevel  
648 Model Comparisons. *Multivar Behav Res* 55:568–599.
- 649 36. Chi X, Yan R, Zhang J, Zhang G, Zhang Y, Hao M, Zhang Z, Fan P, Dong Y, Yang Y, Chen Z, Guo Y, Zhang  
650 J, Li Y, Song X, Chen Y, Xia L, Fu L, Hou L, Xu J, Yu C, Li J, Zhou Q, Chen W. 2020. A neutralizing  
651 human antibody binds to the N-terminal domain of the Spike protein of SARS-CoV-2. *Science*  
652 eabc6952.
- 653 37. Liu L, Wang P, Nair MS, Yu J, Rapp M, Wang Q, Luo Y, Chan JF-W, Sahi V, Figueroa A, Guo XV, Cerutti  
654 G, Bimela J, Gorman J, Zhou T, Chen Z, Yuen K-Y, Kwong PD, Sodroski JG, Yin MT, Sheng Z, Huang Y,  
655 Shapiro L, Ho DD. 2020. Potent neutralizing antibodies against multiple epitopes on SARS-CoV-2  
656 spike. *Nature* 584:450–456.
- 657 38. Cai Y, Zhang J, Xiao T, Peng H, Sterling SM, Walsh RM, Rawson S, Rits-Volloch S, Chen B. 2020.  
658 Distinct conformational states of SARS-CoV-2 spike protein. *Science* eabd4251.
- 659  
660  
661  
662  
663  
664  
665  
  
666  
667  
668  
  
669  
670  
671
